1 Evaluating predictive biomarkers for a binary outcome with linear versus logistic regression –  
2 Practical recommendations for the choice of the model

3

4 Damian Gola<sup>1,2</sup>, Nicole Heßler<sup>1,2</sup>, Markus Schwaninger<sup>2,3</sup>, Andreas Ziegler<sup>1,2,4</sup>, Inke R.

5 König<sup>1,2,4,5\*</sup>

6

7 <sup>1</sup>Institut für Medizinische Biometrie und Statistik, Universität zu Lübeck, Universitätsklinikum  
8 Schleswig-Holstein, Campus Lübeck, Lübeck, Germany.

9 <sup>2</sup>German Centre for Cardiovascular Research (DZHK), partner site Hamburg/Kiel/Lübeck,  
10 Lübeck, Germany.

11 <sup>3</sup>Institut für Experimentelle und Klinische Pharmakologie und Toxikologie, Universität zu  
12 Lübeck, Lübeck, Germany

13 <sup>4</sup> School of Mathematics, Statistics and Computer Science, University of KwaZulu-Natal,  
14 Pietermaritzburg, South Africa.

15 <sup>5</sup>Airway Research Center North (ARCN), Member of the German Center for Lung Research  
16 (DZL).

17

18 E-Mail: [inke.koenig@imbs.uni-luebeck.de](mailto:inke.koenig@imbs.uni-luebeck.de) (IRK)

19

## 20 Abstract

21 A predictive biomarker can forecast whether a patient benefits from a specific treatment  
22 under study. To establish predictiveness of a biomarker, a statistical interaction between the  
23 biomarker status and the treatment group concerning the clinical outcome needs to be  
24 shown. In clinical trials looking at a binary outcome, linear or logistic regression models may  
25 be used to evaluate the interaction, but the effects in the two models are different and  
26 differently interpreted. Specifically, the effects are estimated as absolute risk reductions  
27 (ARRs) and odds ratios (ORs) in the linear and logistic model, thus measuring the effect on an  
28 additive and multiplicative scale, respectively.

29 We derived the relationship between the effects of the linear and the logistic regression  
30 model allowing for translations between the effect estimates between both models. In  
31 addition, we performed a comprehensive simulation study to compare the power of the two  
32 models under a variety of scenarios in different study designs. In general, the differences in  
33 power to detect interaction were minor, and visible differences were detected in rather  
34 unrealistic scenarios of effect size combinations and were usually in favor of the logistic  
35 model.

36 Based on our results and theoretical considerations, we recommend to 1) estimate logistic  
37 regression models because of their statistical properties, 2) test for interaction effects and 3)  
38 calculate and report both ARR and ORs from these using the formulae provided.

39

40

## 41 Introduction

42 Novel technologies and increased accumulated knowledge on the functional background of  
43 diseases have made the application of biomarkers in clinical studies increasingly popular.  
44 Their use is extremely diverse and includes serving as a tool for diagnosis, for staging the  
45 disease, for forecasting disease prognosis or for monitoring and predicting clinical response  
46 [1]. For many instances, it is most helpful to distinguish between prognostic biomarkers and  
47 predictive biomarkers [2].

48 Prognostic biomarkers can forecast the development of the disease. In a randomized clinical  
49 trial, this would usually be the outcome of the study such as remission. Importantly, this  
50 forecast is independent of the intervention but an overall prognosis. Put differently, patients  
51 with different prognostic biomarker profiles would have a different course of disease,  
52 regardless of the intervention group. For example, the epidermal growth factor receptor  
53 tyrosine kinase status is a prognostic factor for survival in patients with non-small cell lung  
54 cancer [3], irrespective of the treatment. Predictive biomarkers, in contrast, predict the  
55 effect of the intervention itself and therefore serve as companion diagnostic tests [4]. Thus,  
56 patients with different predictive biomarker values would differ in how likely they are to  
57 benefit from the specific therapy under study or to suffer from side effects. For instance,  
58 several studies have shown that eosinophil counts in peripheral blood are predictors for  
59 treatment response to Anti-IL-5 in patients with severe asthma [5-7].

60 Biomarkers are considered in clinical trials using different study designs, and these are  
61 described in detail in the literature [2, 4, 8]. Which design should be used depends, among  
62 other aspects, mostly on what is already known about the biomarker and the overall aim of  
63 the study. If the aim is to prove the predictiveness of a biomarker, all patients regardless of  
64 their biomarker status need to be randomized to the treatment groups. This is integrated in

65 the so-called “randomize-all” or “biomarker-stratified” design. Specifically, in the  
66 “randomize-all” design, eligible patients are randomized into the treatment groups before  
67 their biomarker status is assessed (Fig 1A). In the “biomarker-stratified randomization”  
68 design, the biomarker status is assessed first. Then, patients with positive and negative  
69 biomarker status are randomized separately (Fig 1B).

70

71 **Fig 1. Trial designs used in the simulation study.** (A) In the “randomize-all” design  $n$  patients  
72 are assigned irrespectively of their biomarker status to one the treatment groups based on  
73 the randomization factor  $\gamma$ . (B) In the “biomarker-stratified randomization” design,  $n$   
74 patients are assigned to two randomizations based on their biomarker status.

75

76 If, in contrast, only patients with a positive biomarker status are randomized as in the  
77 “targeted” design, it can only be shown that there is a treatment effect in this group, which  
78 does not rule out that also biomarker negative patients benefit from the intervention, who  
79 were not investigated. Furthermore, for establishing a predictive biomarker the trial needs  
80 to show statistically that the treatment effect depends on the biomarker status, i.e., the  
81 interaction between treatment arm and biomarker status has to be established. However, it  
82 does not suffice to analyze biomarker positive and negative subgroups in separate trials and  
83 report an effect in one but not the other group [9]: Firstly, not finding the therapeutic effect  
84 in one group might be due to a lack of power. For example, in the study by Pant et al. [10]  
85 predictiveness of albumin for the treatment of advanced pancreatic cancer with  
86 bevacizumab was claimed on the finding of a positive effect in patients with normal baseline  
87 albumin but not in others. However, only 26 patients with non-normal serum albumin levels  
88 were included in the study. Hence, the confidence interval of the effect is very wide in this

89 subgroup and indeed includes the effect observed in patients with normal serum albumin.  
90 Consequently, it cannot be ruled out that the effect was only not detected in the smaller  
91 group, and no interaction between the treatment and albumin can be observed. A second  
92 reason against claiming predictiveness based on the analysis of subgroups only is that even if  
93 there are effects in both subgroups, predictiveness of the biomarker cannot be excluded,  
94 because the therapeutic effect might be weaker (quantitative interaction) or in the opposite  
95 direction (qualitative interaction) in the second subgroup.  
96 In the following, we will describe the statistical methods to evaluate the biomarker-by-  
97 treatment interaction that needs to be shown for the predictiveness of a biomarker.

## 98 **Statistical evaluation of biomarker-by-treatment interaction**

99 The statistical method of choice to evaluate the biomarker-by-treatment interaction  
100 depends on the data, i.e., the scale of the outcome variable and additional covariables that  
101 are to be included in the model. In the following, we will focus on the simple setting of a  
102 dichotomous outcome without further covariables. As a first approach, a linear regression  
103 framework can be used in which the risk or probability of the dichotomous outcome  $y$  (e.g.  
104 therapy success) is modeled as a function of the dichotomous variables treatment  $T$ ,  
105 biomarker status  $B$ , and treatment-by-biomarker interaction  $TB$  with

$$106 \quad P(y = 1|T,B) = \beta_0 + \beta_T T + \beta_B B + \beta_{TB} TB.$$

107 Here,  $T = 0$  or  $T = 1$  if a patient receives the control treatment or the experimental  
108 treatment,  $B = 0$  or  $B = 1$  if a patient is biomarker negative or positive, and  $TB = 1$  only if a  
109 biomarker positive patient receives the experimental treatment. Through this, the  
110 coefficients  $\beta_T$  and  $\beta_B$  can be interpreted as the increase in risk with a change in the  
111 treatment group and the biomarker status, respectively. The interpretation of these effect

112 estimates as absolute risk reductions (ARRs) is beneficial since it can be directly related to  
113 the number needed to treat (NNT=1/ARR) [11]. The coefficient  $\beta_{TB}$  indicates whether the  
114 influence of  $T$  and  $B$  on  $y$  is independent, in which case it would equal 0. If it deviates from 0,  
115 there is a statistical interaction between  $T$  and  $B$  regarding the risk of the outcome on the  
116 additive scale [12].

117 However, this model has some statistical disadvantages. For example, the predicted  
118 probability might be out of the range of possible values between 0 and 1. The standard  
119 statistical model for analyzing dichotomous outcome in the life sciences therefore is the  
120 logistic regression model. Here, the log odds of the outcome  $y$  is modeled as a function of  $T$   
121 and  $B$  and their interaction  $TB$  by

$$122 \quad \text{logit}(P(y = 1|T,B)) = b_0 + b_T T + b_B B + b_{TB} TB .$$

123 From this, the coefficients  $b_T$  and  $b_B$  can be exponentiated to be interpreted as the increase  
124 in odds of the outcome with a change in the treatment group and the biomarker status,  
125 respectively. The coefficient  $b_{TB}$ , when exponentiated, then measures the treatment-by-  
126 biomarker interaction as the odds ratio (OR) on the multiplicative scale. One advantage of  
127 this model is that the predicted outcome probability will be guaranteed to lie between 0 and  
128 1. Furthermore, the logit link is the natural parameter from the linear exponential family  
129 which provides excellent statistical properties.

130 The linear and the logistic models are different, they have different effect sizes. This can be  
131 seen from S1 Appendix in which we have derived the relation between ARR from the linear  
132 probability model and ORs from the logistic regression model.

133 Concerning the interaction effect, it can be shown that the models lead to different results,  
134 meaning that the evidence for interaction will differ in strength, and that interaction in one  
135 model does not imply interaction in the other. For example, in the study by Bokemeyer et al.

136 [13], patients with metastatic colorectal cancer had been randomized to receive FOLFOX-4  
137 with or without cetuximab and were screened for *K-ras* mutations. A randomize-all design  
138 was used, and, amongst other criteria, the best overall response in both *K-ras* positive and  
139 negative patients was analyzed separately. We re-analyzed the data presented in the paper  
140 and derived that the relative risk of response from a linear regression model under  
141 cetuximab plus FOLFOX-4 versus FOLFOX-4 only was 1.68 in the wild type and 0.64 in the  
142 mutation group, respectively. The corresponding p-value for the interaction was 0.00019. In  
143 the logistic regression model, the odds ratio of response was 2.60 in the wild type and 0.46  
144 in the mutation group, respectively, with an interaction p-value of 0.00023. Therefore, even  
145 though interaction was established in both models, the p-values differ [13].

146 Therefore, given the statistical advantage of the logistic regression model over the linear  
147 probability model, one may question the use of the linear regression model in this setting in  
148 general. However, it has been shown that the statistical problems may not be as large as  
149 anticipated [12, 14] and that, considering the interpretation of the effects, there are indeed  
150 some merits to the linear model. As notional example, we consider the data in Table 1 (left),  
151 showing the risk or probability of an outcome depending on the treatment and biomarker  
152 status. In this example, changing the biomarker status from negative to positive always  
153 increases the risk by 20%, and changing the treatment from control to experimental always  
154 increases the risk by 40%. Thus, there is no additive biomarker by treatment interaction. We  
155 now assume that we wish to select patients who will benefit most from the treatment. If  
156 there were 100 patients each who were biomarker positive and negative, 10 and 30 would  
157 reach a positive outcome, respectively, under control treatment (Fig 2A). Switching to the  
158 experimental treatment instead, the numbers could be increased to 50 and 70, respectively.  
159 This means that in either biomarker group, 20 patients would benefit from the experimental

160 treatment, indicating that the biomarker status does not need to be taken into account  
161 when offering the treatment, which is mirrored by the lack of an additive interaction.  
162 Consider now the data in Table 1 (right), where changing the biomarker status from negative  
163 to positive increases the risk by 10% under control but by 30% under the experimental  
164 therapy, and changing the treatment from control to experimental increases the risk by 20%  
165 for biomarker negative and by 40% for biomarker positive patients. Phrased differently,  
166 changing the biomarker status is always associated with doubling the risk, and changing the  
167 therapy regimen with a 3-fold increase. In this case, there is therefore no multiplicative  
168 interaction. Translating these risks into patient numbers who will benefit from the treatment  
169 (Fig 2B) now shows that by switching the treatment from control to experimental would  
170 benefit 20 biomarker-negative but 40 biomarker-positive patients. Given limited resources,  
171 it might therefore be reasonable to offer the experimental treatment preferably to  
172 biomarker positive patients, even though there is no biomarker by treatment interaction on  
173 the multiplicative scale. From a health economic point of view, it can therefore be argued  
174 that interaction on the additive scale, thus use of the linear regression model, should at least  
175 complement the logistic regression model.

176

177 **Table 1. Notional risk of outcome.**

|           | No additive interaction |       | No multiplicative interaction |       |
|-----------|-------------------------|-------|-------------------------------|-------|
| Treatment | B = 0                   | B = 1 | B = 0                         | B = 1 |
| T = 0     | 0.1                     | 0.3   | 0.1                           | 0.2   |
| T = 1     | 0.5                     | 0.7   | 0.3                           | 0.6   |

178 Notional risk of outcome in biomarker negative (B = 0) and biomarker positive (B = 1)  
179 patients in the control (T = 0) and experimental treatment group (T = 1) in the scenario of no  
180 additive interaction (left) and no multiplicative interaction (right).

181



182 **Fig 2. Number of patients with a positive outcome.** Based on a sample size of 100 in every  
183 constellation in the scenario of (A) no additive interaction and (B) no multiplicative  
184 interaction as specified in Table 1. Solid line: biomarker negative, dashed line: biomarker  
185 positive.

186  
187 Given that interactions on both scales can occur, are relevant and should be analyzed, we  
188 need to know how powerful the statistical analyses will be. More specifically, if there is an  
189 additive interaction, how likely will this be detected using the “false” model, i.e., the logistic  
190 regression? Vice versa, how likely is it to detect a multiplicative interaction when using the  
191 linear regression? To answer these questions, we performed a simulation study that will be  
192 described in the following.

## 193 **Methods**

### 194 **Simulation framework**

195 In our simulation we start from a population with individuals affected and unaffected by the  
196 disease under study, which is indicated by the disease status  $D \in \{1, 0\}$ . Additional to the  
197 general probability of developing the disease, the probability might be influenced by having  
198 or having not a certain biomarker status  $B \in \{1, 0\}$ . A random sample  $R$  of the diseased  
199 individuals is recruited to a clinical trial, comparing an experimental treatment with the  
200 control treatment, denoted by  $T \in \{1, 0\}$ . The trial aims to answer the research question  
201 whether the biomarker  $B$  is predictive, i.e., whether it modifies the probability of treatment  
202 success  $y \in \{1, 0\}$ .

### 203 **Population simulation**

204 We define the prevalence of a dichotomous biomarker  $B$  by  $P(B = 1) = \phi$ . Populations are  
205 simulated by modelling the disease probability by

$$\text{logit}(P(D = 1 | B)) = b_0^D + b_B^D B \quad (1)$$

206 and sampling the disease status  $D$  from a Bernoulli distribution with probability  $P( $D = 1 | B$ )$ . Here,  $b_0^D$  is the baseline log (odds) of the disease and  $b_B^D$  is a prognostic effect  
207 of the biomarker  $B$ .  
208

## 209 Trial designs

210 As illustrated in Fig 1, in the “randomize-all” design  $n$  patients are drawn randomly from a  
211 simulated population. Based on the randomization factor  $\gamma \in (0,1)$ ,  $\gamma n$  randomly chosen  
212 patients receive the biomarker guided treatment ( $T = 1$ ) and  $(1 - \gamma)n$  randomly chosen  
213 patients receive the control treatment ( $T = 0$ ). After the assignment to a treatment arm the  
214 biomarker status is revealed. Thus, the numbers of biomarker positive ( $n_+$ ) and biomarker  
215 negative ( $n_-$ ) patients in each treatment group are determined by the biomarker  
216 prevalence  $\phi$ . In the “biomarker-stratified randomization” design the biomarker status is  
217 revealed before randomization. This enables to draw  $n_+$  biomarker positive and  $n_-$   
218 biomarker negative,  $n = n_+ + n_-$  in total, patients from a simulated population. By  
219 specifying  $n_-$  and  $n_+$ , the prevalence of the biomarker under consideration is not reflected  
220 in this design. In each biomarker stratum, the randomization factors  $\gamma_+ \in (0,1)$  and  $\gamma_-$   
221  $\in (0,1)$  determine the proportion of patients receiving control or biomarker guided  
222 treatment.

## 223 Data simulation

224 In the present simulation study, treatment success is simulated on both the linear and  
225 logistic scale in both trial designs for varying parameters. The procedure to simulate this  
226 data is as follows:

- 227 1. Draw  $n$  patients from a population based on formula ( 1 ).
- 228 2. Assign patients to treatment arms based on  $\gamma$  or  $\gamma_+$  and  $\gamma_-$ , depending on the trial  
229 design.
- 230 3. Calculate the treatment success probability  $P(y = 1)$  by applying either

$$P(y = 1 | T, B) = \text{expit}(b_0 + b_T T + b_B B + b_{TB} TB) \quad (2)$$

231 or

$$P(y = 1 | T, B) = \mu + \beta_T T + \beta_B B + \beta_{TB} TB \quad (3)$$

232 for every patient with  $\text{expit}(c) = \frac{\exp(c)}{1 + \exp(c)}$ , and  $T$  and  $B$  denote the treatment and  
233 biomarker status, respectively.

- 234 4. Sample the treatment success from a Bernoulli distribution using the probability from  
235 formula ( 2 ) or ( 3 ).

236 We consider  $\phi \in \{0.1, 0.25, 0.5\}$  as prevalence for the biomarker, and we use  $b_0^D = 0$  and  $b_B^D$   
237  $= 0$  to simulate populations, i.e., there is no prognostic effect of the biomarker. We create  
238 study populations of sizes  $n \in \{100, 200, 500, 1000\}$ . In case of the “biomarker-stratified  
239 randomization” trial either half of the study population is biomarker positive and the other  
240 half is biomarker negative; alternatively, the proportion of biomarker positive patients is  
241 determined by the biomarker prevalence in the respective simulated population, i.e.

242 specifying  $n_+ = n_- = \frac{n}{2}$  explicitly or specifying only  $n$ , and from this follows  $n_+ \approx \phi n$ . We

243 use  $\gamma, \gamma_+, \gamma_- \in \{0.25, 0.5, 0.75\}$  as randomization factors, and in the “biomarker-stratified

244 randomization” trial all combinations of the values of  $\gamma_+$  and  $\gamma_-$  are considered. The effect

245 sizes to determine the treatment success probability are the cross-product of a range of  
246 possible values. On the linear scale we use

- 247 •  $\beta_0 = 0.5$ ,
- 248 •  $\beta_T \in \{0, 0.1, 0.2, 0.3, 0.4\}$ ,
- 249 •  $\beta_B \in \{-0.4, -0.3, -0.2, -0.1, 0, 0.1, 0.2, 0.3, 0.4\}$  and
- 250 •  $\beta_{TB} \in \{-0.4, -0.3, -0.2, -0.1, 0, 0.1, 0.2, 0.3, 0.4\}$ .

251 Combinations of effect sizes leading to a probability of therapy success less than 0 or greater  
252 than 1 are excluded, e.g.  $\beta_0 = 0.5, \beta_T = 0, \beta_B = -0.4, \beta_{TB} = -0.4$  is not valid.

253 On the logistic scale we use

- 254 •  $b_0 = 0$ ,
- 255 •  $b_T \in \{0, 0.2231, 0.4055, 0.5596, 0.6931\}$  corresponding to OR  
256  $\in \{1, 1.25, 1.50, 1.75, 2\}$ ,
- 257 •  $b_B \in \{-0.6931, -0.5596, -0.4055, -0.2231, 0, 0.2231, 0.4055, 0.5596, 0.6931\}$   
258 corresponding to  $OR \in \{0.5, 0.5713, 0.6667, 0.8, 1, 1.25, 1.5, 1.75, 2\}$
- 259 •  $b_{TB}$   
260  $\in \{-0.6931, -0.5596, -0.4055, -0.2231, 0, 0.2231, 0.4055, 0.5596, 0.6931\}$   
261 corresponding to  $OR \in \{0.5, 0.5713, 0.6667, 0.8, 1, 1.25, 1.5, 1.75, 2\}$ .

262 In total, we use 680 unique effect size combinations for our simulations. Note that effect size  
263 combinations having  $\beta_{TB} = 0$  or  $b_{TB} = 0$  act as null models for the respective regression  
264 model analysis.

## 265 Analyses

266 All simulated data sets are analyzed using both linear and logistic models. Following Kraft et  
267 al. [15], the likelihood ratio-based deviance test between the saturated model

$$\text{logit}(\hat{\pi}) = \hat{b}_0 + \hat{b}_T T + \hat{b}_B B + \hat{b}_{TB} TB \quad (4)$$

268 or

$$\hat{\pi} = \hat{\mu} + \hat{\beta}_T T + \hat{\beta}_B B + \hat{\beta}_{TB} TB, \quad (5)$$

269 where  $\pi = P(D = 1 | B)$ , and a model considering both main effects of treatment and  
270 biomarker but no interaction effect (restricted deviance test) is calculated. In addition, a  
271 Wald-like test on the null hypotheses  $H_0: b_{TB} = 0$  (logistic regression model) or  $H_0: \beta_{TB} = 0$   
272 (linear regression model) in the respective saturated models (4) and (5) is performed. To  
273 obtain reliable estimates for the power to detect an interaction between treatment and  
274 biomarker effect, 1000 replicates are run. For each replicate it is noted whether the two-  
275 sided p-value of the respective test is less than  $\alpha = 0.05$ .

276 All simulations and analyses are done in R 3.3.1 [16] utilizing the R package batchtools [17].

277 The code is available in the supplement (S2 Appendix).

## 278 Results

279 Table 2 shows the estimated frequency of type I errors of the interaction test, i.e., the  
280 restricted deviance test, in logistic and linear regression models to detect a interaction effect  
281 simulated via the linear (upper part) or logistic (lower part) model. Given are the frequencies  
282 in the “randomize-all” trial design with biomarker prevalence  $\phi = 0.1$  and randomization  
283 factor  $\gamma = 0.5$  for some selected effect size combinations with no ( $b_{TB} = \log(1)$  and  $\beta_{TB}$   
284  $= 0$ ), moderate ( $b_{TB} = \log(1.5)$  or  $b_{TB} = \log(\frac{2}{3})$  and  $\beta = \pm 0.2$ ) and strong ( $b_{TB} = \log(0.5)$   
285 or  $b_{TB} = \log(2)$  and  $\beta = \pm 0.4$ ) effects. The effect sizes are given on both the linear and  
286 logistic scale for sample sizes  $n = 200$  and  $n = 500$ , sorted by the biomarker main effects  
287 (Table 2). Other scenarios meeting these restrictions but not displayed are redundant such  
288 that the effects  $\beta_T, \beta_B, b_T$  or  $b_B$  have opposite signs or are permuted.

289

290 **Table 2. Estimated type I error frequency at the nominal two-sided 0.05 test-level in the**

291 **“randomize-all” design.**

| Scen | $\beta_T$ | $\beta_B$ | $\beta_{TB}$ | $b_T$  | $b_B$   | $b_{TB}$ | n = 200  |        | n = 500  |        |
|------|-----------|-----------|--------------|--------|---------|----------|----------|--------|----------|--------|
|      |           |           |              |        |         |          | logistic | linear | logistic | linear |
| 1    | 0.0000    | 0.0000    | 0.0000       | 0.0000 | 0.0000  | 0.0000   | 0.060    | 0.046  | 0.057    | 0.053  |
| 2    | 0.0000    | -0.1000   | 0.0000       | 0.0000 | -0.4055 | 0.0000   | 0.054    | 0.040  | 0.053    | 0.046  |
| 3    | 0.0000    | -0.2000   | 0.0000       | 0.0000 | -0.8473 | 0.0000   | 0.064    | 0.026  | 0.058    | 0.038  |
| 4    | 0.0000    | -0.4000   | 0.0000       | 0.0000 | -2.1972 | 0.0000   | 0.043    | 0.004  | 0.086    | 0.006  |
| 5    | 0.4000    | -0.4000   | 0.0000       | 2.1972 | -2.1972 | 0.0000   | 0.039    | 0.045  | 0.068    | 0.051  |
| 6    | 0.0000    | -0.1667   | 0.0000       | 0.0000 | -0.6931 | 0.0000   | 0.062    | 0.029  | 0.048    | 0.035  |
| 7    | 0.1667    | -0.1667   | 0.0000       | 0.6931 | -0.6931 | 0.0000   | 0.062    | 0.044  | 0.052    | 0.050  |

292 Frequency estimates are based on the likelihood ratio-based restricted deviance test in the

293 “randomize-all” trial design with biomarker prevalence  $\phi = 0.1$  and randomization factor

294  $\gamma = 0.5$ .  $\beta_0 = 0.5$  and  $b_0 = 0$ . Scen = Number of scenario with respective effect size

295 combination  $\beta_T$ ,  $\beta_B$ ,  $\beta_{TB}$  or  $b_T$ ,  $b_B$ ,  $b_{TB}$ . Logistic and linear refer to the type I error frequency in

296 the logistic and linear regression model, respectively.

297

298 Table 2 shows that the frequency of type I errors for the restricted deviance test in both

299 regression models mainly is near to 0.05, as expected, and thus in line with the specified

300 significance level of  $\alpha = 0.05$ . However, in some scenarios the linear and logistic model

301 deviate from the specified significance level. Based on Bradley’s liberal criterion of

302 robustness [18], the type I error frequency should be between 0.025 and 0.075. Both the

303 logistic and the linear model fail to fall into this range in scenario 4, which is characterized by

304 a single strong main effect. The total number and percentage of scenarios violating Bradley’s

305 criterion in the “randomize-all” design is shown in Table 3. In total, 54 times (5% of all  
 306 scenarios) the logistic model has a type I error outside Bradley’s bounds, whereas the linear  
 307 model violates this criterion 123 times (11% of all scenarios). Comparing the numbers per  
 308 model and criterion bound, it is of special interest that the logistic model tends to violate the  
 309 upper bound (liberal) whereas the linear model tends to violate the lower bound  
 310 (conservative).

311

312 **Table 3. Number of scenarios in which type I error frequencies deviate from Bradley’s**  
 313 **criterion [18] in the “randomize-all” design.**

|          |         | n = 100  | n = 200  | n = 500  | n = 1000 | Σ         |
|----------|---------|----------|----------|----------|----------|-----------|
| logistic | > 0.075 | 23 (8%)  | 22 (8%)  | 5 (2%)   | 2 (1%)   | 52 (5%)   |
|          | < 0.025 | 0 (0%)   | 2 (1%)   | 0 (0%)   | 0 (0%)   | 0 (0%)    |
|          | Σ       | 23 (8%)  | 24 (8%)  | 5 (2%)   | 2 (1%)   | 54 (5%)   |
| linear   | > 0.075 | 5 (2%)   | 6 (2%)   | 5 (2%)   | 5 (2%)   | 21 (2%)   |
|          | < 0.025 | 32 (11%) | 25 (9%)  | 23 (8%)  | 22 (8%)  | 102 (9%)  |
|          | Σ       | 37 (13%) | 31 (11%) | 28 (10%) | 27 (9%)  | 123 (11%) |

314 Based on the likelihood ratio-based restricted deviance test in the “biomarker-stratified”  
 315 trial design. All 1152 scenarios with  $\beta_{TB} = b_{TB} = 0$  are considered.

316

317 We next look at the power of the restricted deviance test to detect an interaction effect  
 318 simulated via the linear (Table 4, upper part) or logistic (Table 4, lower part) model in the  
 319 same setting, i.e., the “randomize-all” trial design with the same effect specifications as  
 320 before. Results are sorted by the interaction effects.

321

322 **Table 4. Estimated power at the nominal two-sided 0.05 test-level in the “randomize-all”**

323 **design.**

| Scen | $\beta_T$ | $\beta_B$ | $\beta_{TB}$ | $b_T$  | $b_B$   | $b_{TB}$ | n = 200  |        | n = 500  |        |
|------|-----------|-----------|--------------|--------|---------|----------|----------|--------|----------|--------|
|      |           |           |              |        |         |          | logistic | linear | logistic | linear |
| 8    | 0.2000    | -0.4000   | 0.0000       | 0.8473 | -2.1972 | 0.5026   | 0.077    | 0.015  | 0.108    | 0.017  |
| 9    | 0.0000    | -0.1000   | 0.1000       | 0.0000 | -0.4055 | 0.4055   | 0.084    | 0.065  | 0.107    | 0.102  |
| 10   | 0.0000    | 0.0000    | -0.1000      | 0.0000 | 0.0000  | -0.4055  | 0.080    | 0.064  | 0.105    | 0.100  |
| 11   | 0.1000    | -0.1000   | -0.1000      | 0.4055 | -0.4055 | -0.4055  | 0.086    | 0.072  | 0.105    | 0.100  |
| 12   | 0.1000    | -0.1667   | -0.1000      | 0.4055 | -0.6931 | -0.4055  | 0.085    | 0.062  | 0.103    | 0.097  |
| 13   | 0.1667    | -0.1667   | -0.1000      | 0.6931 | -0.6931 | -0.4055  | 0.076    | 0.059  | 0.113    | 0.115  |
| 14   | 0.0000    | -0.4000   | 0.2000       | 0.0000 | -2.1972 | 1.3499   | 0.218    | 0.084  | 0.423    | 0.239  |
| 15   | 0.0000    | 0.0000    | -0.2000      | 0.0000 | 0.0000  | -0.8473  | 0.144    | 0.113  | 0.282    | 0.258  |
| 16   | 0.0000    | -0.2000   | -0.2000      | 0.0000 | -0.8473 | -1.3499  | 0.204    | 0.071  | 0.436    | 0.227  |
| 17   | 0.2000    | -0.4000   | -0.2000      | 0.8473 | -2.1972 | -0.8473  | 0.077    | 0.054  | 0.156    | 0.223  |
| 18   | 0.4000    | -0.4000   | -0.2000      | 2.1972 | -2.1972 | -0.8473  | 0.088    | 0.148  | 0.160    | 0.376  |
| 19   | 0.0000    | -0.2000   | 0.4000       | 0.0000 | -0.8473 | 1.6946   | 0.437    | 0.401  | 0.770    | 0.764  |
| 20   | 0.0000    | -0.4000   | 0.4000       | 0.0000 | -2.1972 | 2.1972   | 0.556    | 0.404  | 0.881    | 0.799  |
| 21   | 0.2000    | -0.4000   | 0.4000       | 0.8473 | -2.1972 | 2.1972   | 0.513    | 0.396  | 0.876    | 0.827  |
| 22   | 0.1000    | 0.1000    | -0.0077      | 0.4055 | 0.4055  | 0.0000   | 0.067    | 0.038  | 0.052    | 0.040  |
| 23   | 0.1000    | 0.1667    | -0.0167      | 0.4055 | 0.6931  | 0.0000   | 0.070    | 0.040  | 0.063    | 0.042  |
| 24   | 0.1667    | 0.1667    | -0.0333      | 0.6931 | 0.6931  | 0.0000   | 0.063    | 0.035  | 0.059    | 0.036  |
| 25   | 0.1000    | -0.1667   | -0.0048      | 0.4055 | -0.6931 | 0.0000   | 0.065    | 0.050  | 0.059    | 0.050  |
| 26   | 0.1000    | 0.1000    | 0.0714       | 0.4055 | 0.4055  | 0.4055   | 0.095    | 0.042  | 0.096    | 0.056  |
| 27   | 0.1000    | 0.1667    | 0.0515       | 0.4055 | 0.6931  | 0.4055   | 0.080    | 0.030  | 0.107    | 0.042  |
| 28   | 0.1667    | 0.1667    | 0.0238       | 0.6931 | 0.6931  | 0.4055   | 0.073    | 0.028  | 0.096    | 0.026  |
| 29   | 0.0000    | -0.1667   | 0.0952       | 0.0000 | -0.6931 | 0.4055   | 0.090    | 0.061  | 0.102    | 0.090  |



|    |        |         |         |        |         |         |       |       |       |       |
|----|--------|---------|---------|--------|---------|---------|-------|-------|-------|-------|
| 30 | 0.1000 | -0.1667 | 0.0961  | 0.4055 | -0.6931 | 0.4055  | 0.089 | 0.068 | 0.100 | 0.092 |
| 31 | 0.0000 | -0.1000 | -0.0923 | 0.0000 | -0.4055 | -0.4055 | 0.080 | 0.044 | 0.093 | 0.082 |
| 32 | 0.0000 | -0.1667 | -0.0833 | 0.0000 | -0.6931 | -0.4055 | 0.081 | 0.037 | 0.108 | 0.067 |
| 33 | 0.1667 | 0.1667  | -0.1061 | 0.6931 | 0.6931  | -0.4055 | 0.089 | 0.074 | 0.088 | 0.097 |
| 34 | 0.1000 | 0.1000  | 0.1182  | 0.4055 | 0.4055  | 0.6931  | 0.126 | 0.048 | 0.181 | 0.095 |
| 35 | 0.1000 | 0.1667  | 0.0905  | 0.4055 | 0.6931  | 0.6931  | 0.106 | 0.036 | 0.168 | 0.058 |
| 36 | 0.1667 | 0.1667  | 0.0556  | 0.6931 | 0.6931  | 0.6931  | 0.098 | 0.030 | 0.174 | 0.027 |
| 37 | 0.0000 | -0.1000 | 0.1714  | 0.0000 | -0.4055 | 0.6931  | 0.132 | 0.110 | 0.235 | 0.227 |
| 38 | 0.0000 | -0.1667 | 0.1667  | 0.0000 | -0.6931 | 0.6931  | 0.141 | 0.108 | 0.207 | 0.194 |
| 39 | 0.1000 | -0.1667 | 0.1667  | 0.4055 | -0.6931 | 0.6931  | 0.141 | 0.113 | 0.196 | 0.184 |
| 40 | 0.0000 | 0.0000  | -0.1667 | 0.0000 | 0.0000  | -0.6931 | 0.123 | 0.097 | 0.202 | 0.191 |
| 41 | 0.0000 | -0.1000 | -0.1500 | 0.0000 | -0.4055 | -0.6931 | 0.112 | 0.065 | 0.184 | 0.145 |
| 42 | 0.0000 | -0.1667 | -0.1333 | 0.0000 | -0.6931 | -0.6931 | 0.116 | 0.049 | 0.196 | 0.121 |
| 43 | 0.1000 | -0.1000 | -0.1667 | 0.4055 | -0.4055 | -0.6931 | 0.127 | 0.107 | 0.211 | 0.203 |
| 44 | 0.1000 | -0.1667 | -0.1606 | 0.4055 | -0.6931 | -0.6931 | 0.124 | 0.096 | 0.197 | 0.183 |
| 45 | 0.1667 | -0.1667 | -0.1667 | 0.6931 | -0.6931 | -0.6931 | 0.122 | 0.108 | 0.202 | 0.211 |
| 46 | 0.1000 | 0.1000  | -0.1706 | 0.4055 | 0.4055  | -0.6931 | 0.139 | 0.123 | 0.190 | 0.188 |
| 47 | 0.0000 | 0.0000  | -0.4000 | 0.0000 | 0.0000  | -2.1972 | 0.512 | 0.355 | 0.881 | 0.803 |
| 48 | 0.4000 | -0.4000 | -0.4000 | 2.1972 | -2.1972 | -2.1972 | 0.283 | 0.533 | 0.564 | 0.963 |

---

324 Power estimates are based on the likelihood ratio-based restricted deviance test in the  
325 “randomize-all” trial design with biomarker prevalence  $\phi = 0.1$  and randomization factor  
326  $\gamma = 0.5$ .  $\beta_0 = 0.5$  and  $b_0 = 0$ . Scen = Number of scenario with respective effect size  
327 combination  $\beta_T, \beta_B, \beta_{TB}$  or  $b_T, b_B, b_{TB}$ . Logistic and linear refer to the power in the logistic and  
328 linear regression model, respectively.

329

330 In some effect size combinations, an interaction effect is present only on one scale. In  
331 scenario 8 an interaction effect is present only on the logistic scale. The interaction effect  
332 size is rather small compared to the other effect sizes simulated, namely  $b_{TB} = 0.5026$ ,  
333 rendering an odds ratio of 1.6530. Correspondingly, the power in the logistic regression  
334 model to detect the interaction effect is very low at 0.077 ( $n=200$ ) or 0.108 ( $n=500$ ).  
335 Conversely, scenarios 22 to 25 (Table 4, lower part) reflect the situation of no interaction  
336 effect on the logistic scale but only on the linear scale. As in scenario 8 on the logistic scale,  
337 the interaction effect sizes are rather small on the linear scale and the power in the linear  
338 regression model is very low at 0.035 – 0.05 ( $n=200$ ) or 0.036 – 0.05 ( $n=500$ ).  
339 The biggest differences in terms of power between the logistic and linear regression models  
340 can be seen if the interaction effect sizes are most extreme and either no or main effects  
341 with opposite signs are present. For example, in scenario 48, the restricted deviance test in  
342 the linear regression model achieves a power of 0.533, whereas the restricted deviance test  
343 in the logistic regression model achieves a power of 0.283 for sample size  $n = 200$ . This  
344 scenario is characterized by a strong negative predictive effect of the biomarker, a positive  
345 treatment effect and a strong negative interaction as illustrated in Fig 3A. In other scenarios,  
346 the deviance test in the logistic regression model achieves a higher power than in the linear  
347 regression model, for example, in scenarios 14, 16, and 20. Here the difference is between  
348  $\sim 0.13$  and  $\sim 0.15$ , which is illustrated in Fig 3B for scenario 20. These are described by no  
349 treatment effects and a negative predictive effect of the biomarker with an additional  
350 interaction effect. For all other effect size combinations the differences in terms of power  
351 are negligible.

352 S1 and S2 Tables list the corresponding type I error frequency and estimated power for the  
353 same effect size combinations as Tables 2 and 4 in the “biomarker-stratified” trial design

354 with biomarker prevalence  $\phi = 0.1$ , randomization factors  $\gamma_+ = \gamma_- = 0.5$ ,  $n_+$  and  $n_-$   
 355 determined by the prevalence of the biomarker  $\phi$ . As the same sample sizes are eventually  
 356 available in the four groups, the estimated frequencies are very similar to those observed in  
 357 the “randomize-all” trial design. Interestingly, the total number of scenarios violating  
 358 Bradley’s liberal criterion of robustness in the “biomarker-stratified” design with sample  
 359 sizes determined by the prevalence of the biomarker (Table 5) is much higher than in the  
 360 “randomize-all” design (Table 3). Both regression models violate the criterion in about 9% of  
 361 the scenarios with  $\beta_{TB} = b_{TB} = 0$  (logistic 317 times, linear 309 times). Again, the logistic  
 362 model tends to be liberal, violating the upper criterion bound, whereas the linear model  
 363 tends to be conservative, violating the lower criterion bound.

364  
 365 **Fig 3. Illustration of scenarios with notable power differences between regression models.**

366 Number of patients with a positive outcome. Based on a sample size of 100 in every  
 367 constellation in (A) scenario 48 characterized by a strong negative predictive effect of the  
 368 biomarker, a positive treatment effect and a strong negative interaction and in (B) scenario  
 369 20 characterized by no treatment effects and a negative predictive effect of the biomarker  
 370 with an additional interaction effect.

371  
 372 **Table 5. Number of scenarios in which type I error frequencies deviate from Bradley’s**  
 373 **criterion [18] in the “biomarker-stratified” design.**

|          |          | n = 100   | n = 200   | n = 500 | n = 1000 | $\Sigma$ |
|----------|----------|-----------|-----------|---------|----------|----------|
|          | > 0.075  | 171 (20%) | 109 (13%) | 17 (2%) | 11 (1%)  | 308 (9%) |
| logistic | < 0.025  | 2 (0%)    | 7 (1%)    | 0 (0%)  | 0 (0%)   | 9 (0%)   |
|          | $\Sigma$ | 173 (20%) | 116 (13%) | 17 (2%) | 11 (1%)  | 317 (9%) |

|        |          |          |         |         |         |          |
|--------|----------|----------|---------|---------|---------|----------|
|        | > 0.075  | 13 (2%)  | 14 (2%) | 14 (2%) | 14 (2%) | 55 (2%)  |
| linear | < 0.025  | 72 (8%)  | 63 (7%) | 61 (7%) | 58 (7%) | 254 (7%) |
|        | $\Sigma$ | 85 (10%) | 77 (9%) | 75 (9%) | 72 (8%) | 309 (9%) |

374 Based on the likelihood ratio-based restricted deviance test in the “biomarker-stratified”  
375 trial design with  $n_+$  and  $n_-$  determined by  $\phi$ . All 3456 scenarios with  $\beta_{TB} = b_{TB} = 0$  are  
376 considered.  
377  
378 Finally, Tables 6, 7 and 8 list the corresponding type I error frequency, scenarios in which the  
379 type I error frequencies deviate from Bradley’s criterion, and estimated power for the same  
380 effect size combinations with randomization factors  $\gamma_+ = \gamma_- = 0.5$  and fixed proportions of  
381 biomarker positive and biomarker negative patients ( $n_+ = n_- = n/2$ ). It is therefore  
382 assumed that out of a larger patients’ group with biomarker information, only a specified  
383 number is selected and included in the trial, so that there is an equal number of biomarker  
384 positive and negative cases. In this situation, the estimated type I error is very close to the  
385 expected 0.05 in all scenarios with no interaction effect (Table 6), even in scenario 4.  
386 Remarkably, in this trial design, the lowest numbers of scenarios violating Bradley’s criterion  
387 of robustness is observed (Table 7). The logistic model violates the criterion 36 times and the  
388 linear model 81 times, both about 1% of all scenarios with  $\beta_{TB} = b_{TB} = 0$  and  $n_+, n_-$  fixed  
389 at  $\frac{n}{2}$ . Unexpectedly, in this setting the linear model also tends to be liberal.

390  
391 **Table 6. Estimated type I error frequency at the nominal two-sided 0.05 test-level in the**  
392 **“biomarker-stratified” design with fixed proportion of biomarker positive and negative**  
393 **patients.**

| Scen | $\beta_T$ | $\beta_B$ | $\beta_{TB}$ | $b_T$  | $b_B$   | $b_{TB}$ | n = 200  |        | n = 500  |        |
|------|-----------|-----------|--------------|--------|---------|----------|----------|--------|----------|--------|
|      |           |           |              |        |         |          | logistic | linear | logistic | linear |
| 1    | 0.0000    | 0.0000    | 0.0000       | 0.0000 | 0.0000  | 0.0000   | 0.054    | 0.054  | 0.054    | 0.054  |
| 2    | 0.0000    | -0.1000   | 0.0000       | 0.0000 | -0.4055 | 0.0000   | 0.061    | 0.059  | 0.045    | 0.045  |
| 3    | 0.0000    | -0.2000   | 0.0000       | 0.0000 | -0.8473 | 0.0000   | 0.049    | 0.046  | 0.044    | 0.045  |
| 4    | 0.0000    | -0.4000   | 0.0000       | 0.0000 | -2.1972 | 0.0000   | 0.055    | 0.047  | 0.051    | 0.050  |
| 5    | 0.4000    | -0.4000   | 0.0000       | 2.1972 | -2.1972 | 0.0000   | 0.060    | 0.055  | 0.056    | 0.049  |
| 6    | 0.0000    | -0.1667   | 0.0000       | 0.0000 | -0.6931 | 0.0000   | 0.046    | 0.047  | 0.044    | 0.041  |
| 7    | 0.1667    | -0.1667   | 0.0000       | 0.6931 | -0.6931 | 0.0000   | 0.053    | 0.045  | 0.044    | 0.045  |

394 Frequency estimates are based on the likelihood ratio-based restricted deviance test in the  
 395 “biomarker-stratified” trial design with biomarker prevalence  $\phi = 0.1$ , randomization factors  
 396  $\gamma_+ = \gamma_- = 0.5$  and  $n_+ = n_- = \frac{n}{2}$ ,  $\beta_0 = 0.5$  and  $b_0 = 0$ . Scen = Number of scenario with  
 397 respective effect size combination  $\beta_T, \beta_B, \beta_{TB}$  or  $b_T, b_B, b_{TB}$ . Logistic and linear refer to the type  
 398 I error frequency in the logistic and linear regression model, respectively.

399

400 **Table 7. Number of scenarios in which type I error frequencies deviate from Bradley’s**  
 401 **criterion [18] in the “biomarker-stratified” design.**

|          |          | n = 100 | n = 200 | n = 500 | n = 1000 | $\Sigma$ |
|----------|----------|---------|---------|---------|----------|----------|
| logistic | > 0.075  | 27 (3%) | 9 (1%)  | 0 (0%)  | 0 (0%)   | 36 (1%)  |
|          | < 0.025  | 0 (0%)  | 0 (0%)  | 0 (0%)  | 0 (0%)   | 0 (0%)   |
|          | $\Sigma$ | 27 (3%) | 9 (1%)  | 0 (0%)  | 0 (0%)   | 36 (1%)  |
| linear   | > 0.075  | 18 (2%) | 15 (2%) | 6 (1%)  | 18 (2%)  | 57 (2%)  |
|          | < 0.025  | 9 (1%)  | 9 (1%)  | 3 (0%)  | 3 (0%)   | 24 (1%)  |
|          | $\Sigma$ | 27 (3%) | 24 (3%) | 9 (1%)  | 21 (2%)  | 81 (2%)  |

402 Based on the likelihood ratio-based restricted deviance test in the “biomarker-stratified”  
 403 trial design with  $n_+ = n_- = \frac{n}{2}$ . All 3456 scenarios with  $\beta_{TB} = b_{TB} = 0$  are considered.  
 404  
 405 Similar as in the previous designs, if an interaction effect is present only on one scale, it is  
 406 hard to detect, resulting in a low power. In general, however, the pattern of the estimated  
 407 power is very similar to before, with an overall higher power due to balanced sample sizes.  
 408  
 409 **Table 8. Estimated power at the nominal two-sided 0.05 test-level in the “biomarker-**  
 410 **stratified” design with fixed proportion of biomarker positive and negative patients.**

| Scen | $\beta_T$ | $\beta_B$ | $\beta_{TB}$ | $b_T$  | $b_B$   | $b_{TB}$ | n = 200  |        | n = 500  |        |
|------|-----------|-----------|--------------|--------|---------|----------|----------|--------|----------|--------|
|      |           |           |              |        |         |          | logistic | linear | logistic | linear |
| 8    | 0.2000    | -0.4000   | 0.0000       | 0.8473 | -2.1972 | 0.5026   | 0.132    | 0.047  | 0.188    | 0.038  |
| 9    | 0.0000    | -0.1000   | 0.1000       | 0.0000 | -0.4055 | 0.4055   | 0.112    | 0.111  | 0.210    | 0.210  |
| 10   | 0.0000    | 0.0000    | -0.1000      | 0.0000 | 0.0000  | -0.4055  | 0.130    | 0.129  | 0.202    | 0.199  |
| 11   | 0.1000    | -0.1000   | -0.1000      | 0.4055 | -0.4055 | -0.4055  | 0.108    | 0.110  | 0.210    | 0.209  |
| 12   | 0.1000    | -0.1667   | -0.1000      | 0.4055 | -0.6931 | -0.4055  | 0.112    | 0.114  | 0.200    | 0.210  |
| 13   | 0.1667    | -0.1667   | -0.1000      | 0.6931 | -0.6931 | -0.4055  | 0.111    | 0.116  | 0.210    | 0.218  |
| 14   | 0.0000    | -0.4000   | 0.2000       | 0.0000 | -2.1972 | 1.3499   | 0.537    | 0.354  | 0.896    | 0.709  |
| 15   | 0.0000    | 0.0000    | -0.2000      | 0.0000 | 0.0000  | -0.8473  | 0.342    | 0.328  | 0.657    | 0.636  |
| 16   | 0.0000    | -0.2000   | -0.2000      | 0.0000 | -0.8473 | -1.3499  | 0.539    | 0.361  | 0.900    | 0.694  |
| 17   | 0.2000    | -0.4000   | -0.2000      | 0.8473 | -2.1972 | -0.8473  | 0.194    | 0.431  | 0.402    | 0.806  |
| 18   | 0.4000    | -0.4000   | -0.2000      | 2.1972 | -2.1972 | -0.8473  | 0.195    | 0.448  | 0.398    | 0.815  |
| 19   | 0.0000    | -0.2000   | 0.4000       | 0.0000 | -0.8473 | 1.6946   | 0.831    | 0.831  | 0.996    | 0.996  |
| 20   | 0.0000    | -0.4000   | 0.4000       | 0.0000 | -2.1972 | 2.1972   | 0.945    | 0.869  | 0.998    | 0.995  |

|    |        |         |         |        |         |         |       |       |       |       |
|----|--------|---------|---------|--------|---------|---------|-------|-------|-------|-------|
| 21 | 0.2000 | -0.4000 | 0.4000  | 0.8473 | -2.1972 | 2.1972  | 0.924 | 0.914 | 1.000 | 0.999 |
| 22 | 0.1000 | 0.1000  | -0.0077 | 0.4055 | 0.4055  | 0.0000  | 0.037 | 0.037 | 0.055 | 0.050 |
| 23 | 0.1000 | 0.1667  | -0.0167 | 0.4055 | 0.6931  | 0.0000  | 0.045 | 0.041 | 0.049 | 0.054 |
| 24 | 0.1667 | 0.1667  | -0.0333 | 0.6931 | 0.6931  | 0.0000  | 0.041 | 0.048 | 0.041 | 0.055 |
| 25 | 0.1000 | -0.1667 | -0.0048 | 0.4055 | -0.6931 | 0.0000  | 0.053 | 0.048 | 0.038 | 0.039 |
| 26 | 0.1000 | 0.1000  | 0.0714  | 0.4055 | 0.4055  | 0.4055  | 0.094 | 0.066 | 0.213 | 0.145 |
| 27 | 0.1000 | 0.1667  | 0.0515  | 0.4055 | 0.6931  | 0.4055  | 0.092 | 0.060 | 0.181 | 0.089 |
| 28 | 0.1667 | 0.1667  | 0.0238  | 0.6931 | 0.6931  | 0.4055  | 0.088 | 0.041 | 0.175 | 0.057 |
| 29 | 0.0000 | -0.1667 | 0.0952  | 0.0000 | -0.6931 | 0.4055  | 0.107 | 0.107 | 0.202 | 0.193 |
| 30 | 0.1000 | -0.1667 | 0.0961  | 0.4055 | -0.6931 | 0.4055  | 0.110 | 0.105 | 0.204 | 0.200 |
| 31 | 0.0000 | -0.1000 | -0.0923 | 0.0000 | -0.4055 | -0.4055 | 0.125 | 0.116 | 0.187 | 0.169 |
| 32 | 0.0000 | -0.1667 | -0.0833 | 0.0000 | -0.6931 | -0.4055 | 0.118 | 0.109 | 0.182 | 0.147 |
| 33 | 0.1667 | 0.1667  | -0.1061 | 0.6931 | 0.6931  | -0.4055 | 0.101 | 0.123 | 0.186 | 0.241 |
| 34 | 0.1000 | 0.1000  | 0.1182  | 0.4055 | 0.4055  | 0.6931  | 0.205 | 0.135 | 0.442 | 0.305 |
| 35 | 0.1000 | 0.1667  | 0.0905  | 0.4055 | 0.6931  | 0.6931  | 0.179 | 0.103 | 0.401 | 0.195 |
| 36 | 0.1667 | 0.1667  | 0.0556  | 0.6931 | 0.6931  | 0.6931  | 0.154 | 0.057 | 0.366 | 0.107 |
| 37 | 0.0000 | -0.1000 | 0.1714  | 0.0000 | -0.4055 | 0.6931  | 0.235 | 0.236 | 0.520 | 0.520 |
| 38 | 0.0000 | -0.1667 | 0.1667  | 0.0000 | -0.6931 | 0.6931  | 0.235 | 0.228 | 0.491 | 0.482 |
| 39 | 0.1000 | -0.1667 | 0.1667  | 0.4055 | -0.6931 | 0.6931  | 0.216 | 0.212 | 0.505 | 0.505 |
| 40 | 0.0000 | 0.0000  | -0.1667 | 0.0000 | 0.0000  | -0.6931 | 0.249 | 0.244 | 0.498 | 0.483 |
| 41 | 0.0000 | -0.1000 | -0.1500 | 0.0000 | -0.4055 | -0.6931 | 0.235 | 0.213 | 0.476 | 0.419 |
| 42 | 0.0000 | -0.1667 | -0.1333 | 0.0000 | -0.6931 | -0.6931 | 0.212 | 0.179 | 0.427 | 0.339 |
| 43 | 0.1000 | -0.1000 | -0.1667 | 0.4055 | -0.4055 | -0.6931 | 0.231 | 0.227 | 0.474 | 0.475 |
| 44 | 0.1000 | -0.1667 | -0.1606 | 0.4055 | -0.6931 | -0.6931 | 0.216 | 0.216 | 0.467 | 0.473 |
| 45 | 0.1667 | -0.1667 | -0.1667 | 0.6931 | -0.6931 | -0.6931 | 0.228 | 0.237 | 0.451 | 0.482 |

|    |        |         |         |        |         |         |       |       |       |       |
|----|--------|---------|---------|--------|---------|---------|-------|-------|-------|-------|
| 46 | 0.1000 | 0.1000  | -0.1706 | 0.4055 | 0.4055  | -0.6931 | 0.249 | 0.247 | 0.488 | 0.488 |
| 47 | 0.0000 | 0.0000  | -0.4000 | 0.0000 | 0.0000  | -2.1972 | 0.939 | 0.871 | 1.000 | 0.998 |
| 48 | 0.4000 | -0.4000 | -0.4000 | 2.1972 | -2.1972 | -2.1972 | 0.718 | 0.972 | 0.979 | 1.000 |

---

411 Power estimates are based on the likelihood ratio-based restricted deviance test in the  
 412 “biomarker-stratified” trial design with biomarker prevalence  $\phi = 0.1$ , randomization factors  
 413  $\gamma_+ = \gamma_- = 0.5$  and  $n_+ = n_- = \frac{n}{2}$ .  $\beta_0 = 0.5$  and  $b_0 = 0$ . Scen = Number of scenario with  
 414 respective effect size combination  $\beta_T, \beta_B, \beta_{TB}$  or  $b_T, b_B, b_{TB}$ . Logistic and linear refer to the  
 415 power in the logistic and linear regression model, respectively.

416

417 For an overview, Table 9 shows a comparison of the estimated power across the considered  
 418 scenarios. Here, the number of scenarios is given in which the power in the linear and  
 419 logistic regression model is comparable (less than 3% difference), in which one of the models  
 420 is slightly better (difference between 3% and 10%), and in which one of the models is better  
 421 (difference greater than 10%). These numbers are given for all considered scenarios and only  
 422 for scenarios without extreme effect constellations. For the vast majority of scenarios, the  
 423 difference in estimated power of the linear and logistic model is irrelevant, i.e., the  
 424 difference is less than 3%, and differences are smaller with larger sample sizes. If relevant  
 425 power differences are observed, this is usually in favor of the logistic model. Interestingly,  
 426 this pattern remains the same when scenarios with extreme effect combinations are not  
 427 considered.

428

429 **Table 9. Power comparison for restricted deviance test.**



|                                |                                              | Randomize-All      |                | Biomarker-<br>Stratified |                | Biomarker-<br>Stratified* |                |
|--------------------------------|----------------------------------------------|--------------------|----------------|--------------------------|----------------|---------------------------|----------------|
|                                |                                              | n=200              | n=500          | n=200                    | n=500          | n=200                     | n=500          |
| all scenarios<br>(599)         | logistic >> linear                           | 24<br>(4.0%)       | 6<br>(1.0%)    | 23<br>(3.8%)             | 4<br>(0.7%)    | 2<br>(0.3%)               | 2<br>(0.3%)    |
|                                | logistic > linear                            | 232<br>(38.7%)     | 78<br>(13.0%)  | 184<br>(30.7%)           | 77<br>(12.9%)  | 34<br>(5.7%)              | 13<br>(2.2%)   |
|                                | logistic = linear                            | 332<br>(55.4%)     | 499<br>(83.3%) | 379<br>(63.3%)           | 503<br>(84.0%) | 550<br>(91.8%)            | 576<br>(96.2%) |
|                                | logistic < linear                            | 11<br>(1.8%)       | 16<br>(2.7%)   | 13<br>(2.2%)             | 15<br>(2.5%)   | 12<br>(2.0%)              | 8<br>(1.3%)    |
|                                | logistic << linear                           | 0<br>(0%)          | 0<br>(0%)      | 0<br>(0%)                | 0<br>(0%)      | 1<br>(0.2%)               | 0<br>(0%)      |
|                                | excluding most<br>extreme scenarios<br>(535) | logistic >> linear | 24<br>(4.5%)   | 6<br>(1.1%)              | 23<br>(4.3%)   | 4<br>(0.7%)               | 2<br>(0.4%)    |
|                                | logistic > linear                            | 212<br>(39.3%)     | 75<br>(13.9%)  | 164<br>(30.4%)           | 75<br>(13.9%)  | 32<br>(5.9%)              | 13<br>(2.4%)   |
|                                | logistic = linear                            | 297<br>(55.1%)     | 450<br>(83.5%) | 343<br>(63.6%)           | 453<br>(84.0%) | 498<br>(92.4%)            | 516<br>(95.7%) |
|                                | logistic < linear                            | 6<br>(1.1%)        | 8<br>(1.5%)    | 9<br>(1.7%)              | 7<br>(1.3%)    | 6<br>(1.1%)               | 8<br>(1.5%)    |
|                                | logistic << linear                           | 0<br>(0%)          | 0<br>(0%)      | 0<br>(0%)                | 0<br>(0%)      | 1<br>(0.2%)               | 0<br>(0%)      |
| excluding extreme<br>scenarios | logistic >> linear                           | 24<br>(4.7%)       | 6<br>(1.2%)    | 23<br>(4.5%)             | 4<br>(0.8%)    | 2<br>(0.4%)               | 2<br>(0.4%)    |

|       |                    |         |         |         |         |         |         |
|-------|--------------------|---------|---------|---------|---------|---------|---------|
| (515) | logistic > linear  | 206     | 74      | 157     | 74      | 32      | 13      |
|       |                    | (40.0%) | (14.4%) | (30.5%) | (14.4%) | (6.2%)  | (2.5%)  |
|       | logistic = linear  | 282     | 428     | 331     | 431     | 474     | 492     |
|       |                    | (54.8%) | (83.1%) | (64.3%) | (83.7%) | (92.0%) | (95.5%) |
|       | logistic < linear  | 3       | 7       | 4       | 6       | 6       | 8       |
|       |                    | (0.6%)  | (1.4%)  | (0.8%)  | (1.2%)  | (1.2%)  | (1.6%)  |
|       | logistic << linear | 0       | 0       | 0       | 0       | 1       | 0       |
|       |                    | (0%)    | (0%)    | (0%)    | (0%)    | (0.2%)  | (0%)    |

430 Power estimates are based on the likelihood ratio-based restricted deviance test. Biomarker

431 prevalence  $\phi = 0.1$ , randomization factors  $\gamma = \gamma_+ = \gamma_- = 0.5$ .  $\beta_0 = 0.5$  and  $b_0 = 0$ .

432 “Biomarker Stratified\*” is with  $n_+ = n_- = n/2$ .

433 All = All scenarios with both  $b_{TB} \neq 0$  and  $\beta_{TB} \neq 0$ .

434 Excluding most extreme scenarios = All scenarios with both  $b_{TB} \neq 0$  and  $\beta_{TB} \neq 0$  and

435 excluding scenarios with 2 or 3 linear regression parameters  $\geq \pm 0.4$ .

436 Excluding extreme scenarios = All scenarios with both  $b_{TB} \neq 0$  and  $\beta_{TB} \neq 0$  and excluding

437 scenarios with 2 or 3 linear regression parameters  $\geq \pm 0.3$ .

438 “>>” indicates power difference  $> 10\%p$ . “>” indicates power difference  $> 3\%p$ . “=”

439 indicates power difference  $\leq 3\%p$ .

440

441 The above results were obtained from using the likelihood-based restricted deviance test for

442 interaction. Using a Wald-like test instead produces the same results in the linear model, but

443 lower type I and type II errors in the logistic model. The number of scenarios in which the

444 type I error frequencies deviate from Bradley’s criterion in the Wald-like test are shown in S3

445 to S5 Tables. In addition, we presented only a limited selection of the simulation results, but

446 the preceding descriptions are also valid for the other simulation settings, and a compilation  
447 of all results can be found in S6 Table (note that the numbers of the effect size combinations  
448 in S6 Table are not the same as in Tables 2, 4, 6, 8).

## 449 **Discussion and conclusions**

450 The predictiveness of a biomarker can be evaluated via the treatment-by-biomarker  
451 interaction in linear or logistic regression models for a binary outcome, and we have derived  
452 the relationship between the effects of the linear model and the logistic model (S1  
453 Appendix). The translation between ORs from the logistic and AARs from the linear model  
454 might be useful, since the ARRs can in turn be used to calculate the NNT which is helpful for  
455 the clinical interpretation. In a comprehensive simulation study, we compared the power of  
456 the linear and logistic regression models to detect the predictiveness of a biomarker under a  
457 variety of scenarios in the randomize-all and the biomarker-stratified design. In general, we  
458 found that the differences in power to detect interaction were minor. Visible differences in  
459 power were detected in rather unrealistic scenarios of effect size combinations and were  
460 usually in favor of the logistic model. If the number of biomarker-positive and biomarker-  
461 negative patients in the biomarker-stratified design was guided by the prevalence of the  
462 biomarker, we did not find notable differences compared to the randomize-all design.  
463 However, if equal subgroups of biomarker-positive and biomarker-negative patients could  
464 be selected in the biomarker-stratified design, the power was decidedly greater owing to the  
465 balanced samples sizes.  
466 Different baseline probabilities were not considered in our simulations. These could have  
467 impact on the power of both regression models and the power differences as well, especially  
468 if they are close to 0 and 1. However, we assume that these values only play a minor role in  
469 applications.

470 For choosing between the logistic and the linear model for a clinical trial that aims at  
471 showing predictiveness of a biomarker one should therefore consider the following factors:

- 472 1. The linear regression model has statistical disadvantages. For example, the predicted  
473 probability might be out of the 0-1-range of possible values. Furthermore, the model  
474 fit is rather poor if the predicted probabilities are close to 0 or 1. In the logistic  
475 regression model, the error terms follow a binomial distribution, and statistical  
476 properties are generally good for a binary outcome [19].
- 477 2. As expected, the type I error frequency was adequate in both models, unless the  
478 scenarios were extreme, where the linear model was sometimes conservative.
- 479 3. Power was comparable, again unless the effect size combinations were highly  
480 unusual. If there were differences, the logistic model usually had higher power than  
481 the linear probability model.
- 482 4. The effects from the linear model can be interpreted in a more straightforward way,  
483 which was also pointed out by Hellevik [14] in the case of main effects, and ARR and  
484 OR can be translated into each other.

485 Thus, the choice of the appropriate regression model should always be driven by the  
486 primary aim of a study [19] and is influenced by two different currents, the statistical  
487 properties and the ease of interpretation. From the statistical viewpoint one should favor  
488 the most sparse model. Following this, one could estimate both models and select the one  
489 with the least number of non-zero estimates. However, our simulations have shown that it  
490 is hard to find effect size combinations with non-zero effects on only one scale. Thus, from a  
491 practical point of view one should favor the logistic regression model, and inference based  
492 on the logistic regression model estimates should be theoretically more valid than inference  
493 based on linear regression model estimates. Consequently, the logistic model should be

494 used if the presence of an interaction effect is to be tested. Concerning the interpretation  
495 regarding the treatment effect in different groups, the linear model seems recommendable.  
496 With our results in mind, it therefore seems recommendable to estimate logistic regression  
497 models because of their statistical properties, test for interaction effects and calculate and  
498 report both ARRs and ORs from these using the formulae provided in the appendix.

499

## 500 **References**

- 501 1. Biomarkers and surrogate endpoints: preferred definitions and conceptual framework.  
502 Clin Pharmacol Ther. 2001;69(3):89-95.
- 503 2. Buyse M, Michiels S, Sargent DJ, Grothey A, Matheson A, de Gramont A. Integrating  
504 biomarkers in clinical trials. Expert Rev Mol Diagn. 2011;11(2):171-82.
- 505 3. Riley RD, Hayden JA, Steyerberg EW, Moons KG, Abrams K, Kyzas PA, et al. Prognosis  
506 Research Strategy (PROGRESS) 2: prognostic factor research. PLoS Med.  
507 2013;10(2):e1001380.
- 508 4. Ziegler A, Koch A, Krockenberger K, Grosshennig A. Personalized medicine using DNA  
509 biomarkers: a review. Hum Genet. 2012;131(10):1627-38.
- 510 5. Bjermer L, Lemiere C, Maspero J, Weiss S, Zangrilli J, Germinaro M. Reslizumab for  
511 inadequately controlled asthma with elevated blood eosinophil levels: A randomized  
512 phase 3 study. Chest. 2016;150(4):789-98.
- 513 6. Corren J, Weinstein S, Janka L, Zangrilli J, Garin M. Phase 3 study of reslizumab in  
514 patients with poorly controlled asthma: effects across a broad range of eosinophil  
515 counts. Chest. 2016;150(4):799-810.
- 516 7. FitzGerald JM, Bleecker ER, Nair P, Korn S, Ohta K, Lommatzsch M, et al. Benralizumab,  
517 an anti-interleukin-5 receptor alpha monoclonal antibody, as add-on treatment for

- 518 patients with severe, uncontrolled, eosinophilic asthma (CALIMA): a randomised,  
519 double-blind, placebo-controlled phase 3 trial. *Lancet*. 2016.
- 520 8. Wang SJ, O'Neill RT, Hung HM. Approaches to evaluation of treatment effect in  
521 randomized clinical trials with genomic subset. *Pharm Stat*. 2007;6(3):227-44.
- 522 9. Brookes ST, Whitely E, Egger M, Smith GD, Mulheran PA, Peters TJ. Subgroup analyses in  
523 randomized trials: risks of subgroup-specific analyses; power and sample size for the  
524 interaction test. *J Clin Epidemiol*. 2004;57(3):229-36.
- 525 10. Pant S, Martin LK, Geyer S, Wei L, Van Loon K, Sommovilla N, et al. Baseline serum  
526 albumin is a predictive biomarker for patients with advanced pancreatic cancer treated  
527 with bevacizumab: a pooled analysis of 7 prospective trials of gemcitabine-based  
528 therapy with or without bevacizumab. *Cancer*. 2014;120(12):1780-6.
- 529 11. Elferink A, Van Zwieten-Boot B. Analysis based on number needed to treat shows  
530 differences between drugs studied. *Brit Med J*. 1997;314:603.
- 531 12. vanderWeele T, Knol M. A tutorial on interaction. *Epidemiol Methods*. 2014;3(1):33-72.
- 532 13. Bokemeyer C, Bondarenko I, Hartmann JT, de Braud F, Schuch G, Zube A, et al. Efficacy  
533 according to biomarker status of cetuximab plus FOLFOX-4 as first-line treatment for  
534 metastatic colorectal cancer: the OPUS study. *Ann Oncol*. 2011;22(7):1535-46.
- 535 14. Hellevik O. Linear versus logistic regression when the dependent variable is a  
536 dichotomy. *Qual Quant*. 2009;43:59-74.
- 537 15. Kraft P, Yen YC, Stram DO, Morrison J, Gauderman WJ. Exploiting gene-environment  
538 interaction to detect genetic associations. *Human Heredity*. 2007;63(2):111-9.
- 539 16. R Core Team. R: A Language and environment for statistical computing. Vienna, Austria.  
540 <https://www.R-project.org/>. R Foundation for Statistical Computing; 2016.

- 541 17. Lang M, Bischl B, Surmann D. batchtools: Tools for R to work on batch systems. J Open  
542 Source Softw. 2017;2(10).
- 543 18. Bradley JV. Robustness? Br J Math Stat Psychol. 1978;31:144-52.
- 544 19. Ganzach Y, Saporta I, Weber Y. Interaction in linear versus logistic models: a substantive  
545 illustration using the relationship between motivation, ability, and performance. Organ  
546 Res Meth. 2000;3(3):237-53.

547

## 548 Supporting information

549 **S1 Appendix. Relation between absolute risk reductions from linear probability models**  
550 **and odds ratios from logistic regression models.**

551 **S2 Appendix. Simulation code.** Refer to included README for further information.

552 **S1 Table. Estimated type I error frequency at the nominal two-sided 0.05 test-level in the**  
553 **“biomarker-stratified” design with biomarker prevalence 0.1.** Frequency estimates are  
554 based on the likelihood ratio-based restricted deviance test in the “biomarker-stratified”  
555 trial design with biomarker prevalence  $\phi = 0.1$ , randomization factors  $\gamma_+ = \gamma_- = 0.5$  and  
556  $n_+$  and  $n_-$  are determined by  $\phi$ .  $\beta_0 = 0.5$  and  $b_0 = 0$ . Scen = Number of scenario with  
557 respective effect size combination  $\beta_T, \beta_B, \beta_{TB}$  or  $b_T, b_B, b_{TB}$ . Logistic and linear refer to the type  
558 I error frequency in the logistic and linear regression model, respectively.

559 **S2 Table. Estimated power at the nominal two-sided 0.05 test-level in the “biomarker-**  
560 **stratified” design with biomarker prevalence 0.1.** Power estimates are based on the  
561 likelihood ratio-based restricted deviance test in the “biomarker-stratified” trial design with  
562 biomarker prevalence  $\phi = 0.1$ , randomization factors  $\gamma_+ = \gamma_- = 0.5$  and  $n_+$  and  $n_-$  are  
563 determined by  $\phi$ .  $\beta_0 = 0.5$  and  $b_0 = 0$ . Scen = Number of scenario with respective effect size

564 combination  $\beta_T, \beta_B, \beta_{TB}$  or  $b_T, b_B, b_{TB}$ . Logistic and linear refer to the power in the logistic and  
565 linear regression model, respectively.

566 **S3 Table. Number of scenarios in which type I error frequencies deviate from Bradley's**  
567 **criterion [18] in the "randomize-all" design.** Based on the Wald-test in the "biomarker-  
568 stratified" trial design. All 1152 scenarios with  $\beta_{TB} = b_{TB} = 0$  are considered.

569 **S4 Table. Number of scenarios in which type I error frequencies deviate from Bradley's**  
570 **criterion [18] in the "biomarker-stratified" design.** Based on the Wald-test in the  
571 "biomarker-stratified" trial design with  $n_+$  and  $n_-$  determined by  $\phi$ . All 3456 scenarios with  
572  $\beta_{TB} = b_{TB} = 0$  are considered.

573 **S5 Table. Number of scenarios in which type I error frequencies deviate from Bradley's**  
574 **criterion [18] in the "biomarker-stratified" design.** Based on the Wald-test in the  
575 "biomarker-stratified" trial design with  $n_+ = n_- = \frac{n}{2}$ . All 3456 scenarios with  $\beta_{TB} = b_{TB} = 0$   
576 are considered.

577 **S6 Table. Compilation of all simulation results.** The numbers of the effect size combinations  
578 are not the same as in Tables 2, 4, 6, 8.



**A**enroll  $n$   
patients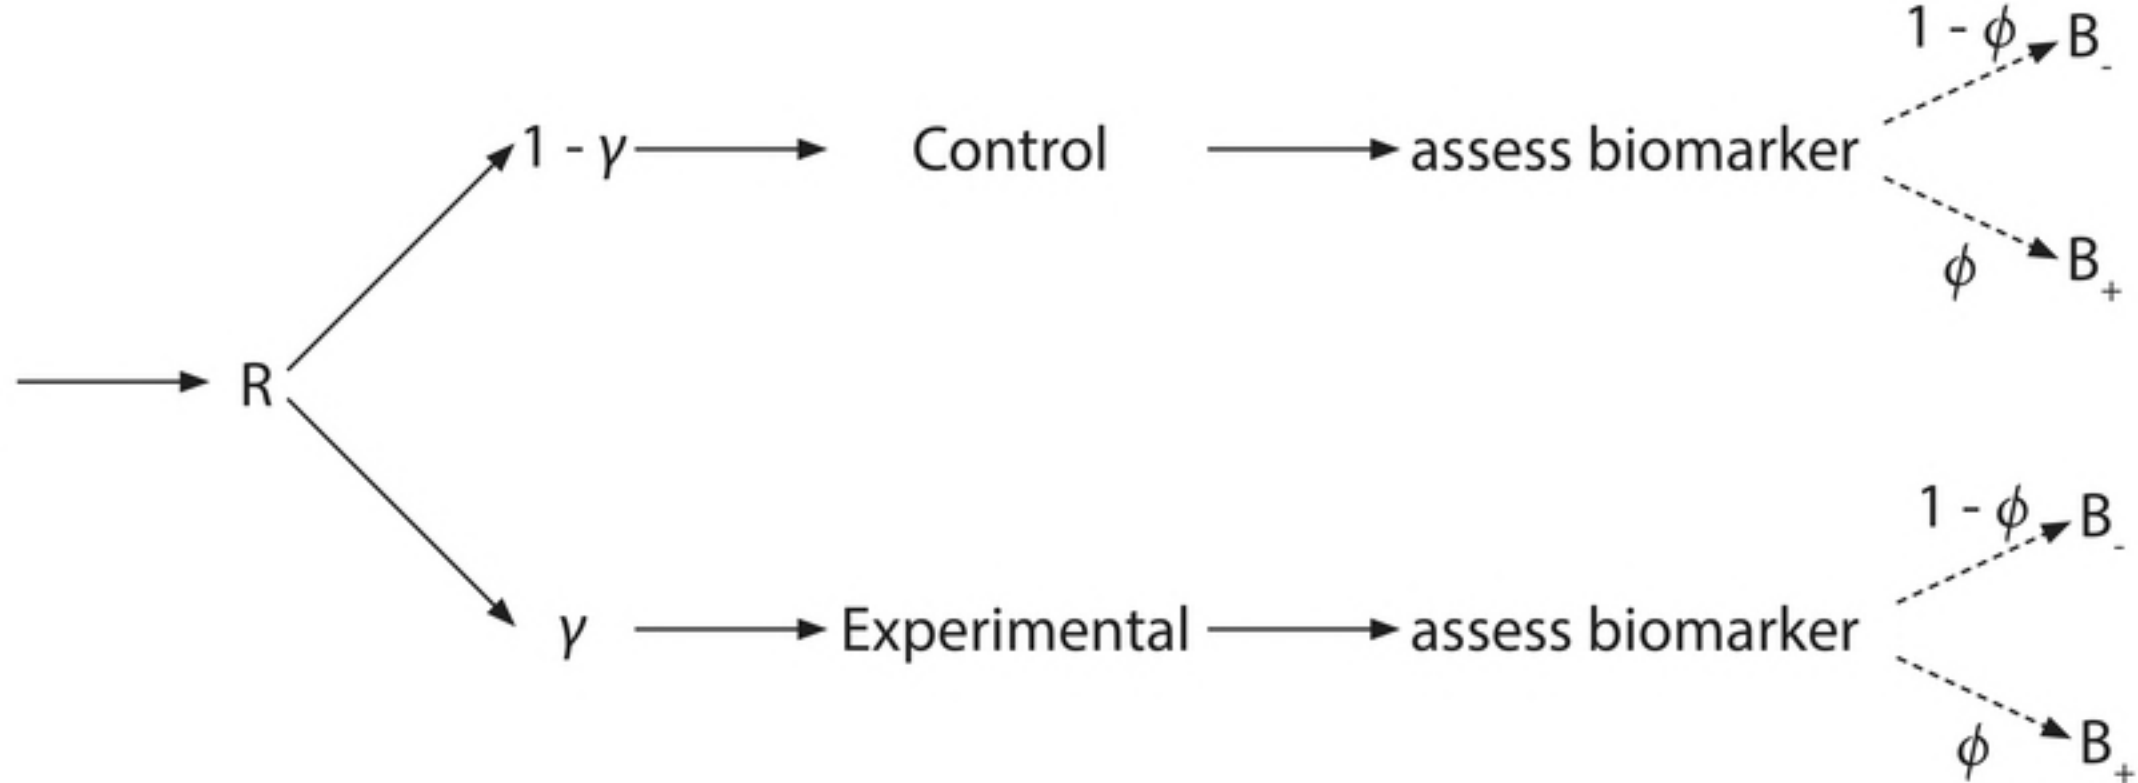**B**enroll  $n = n_+ + n_-$   
patients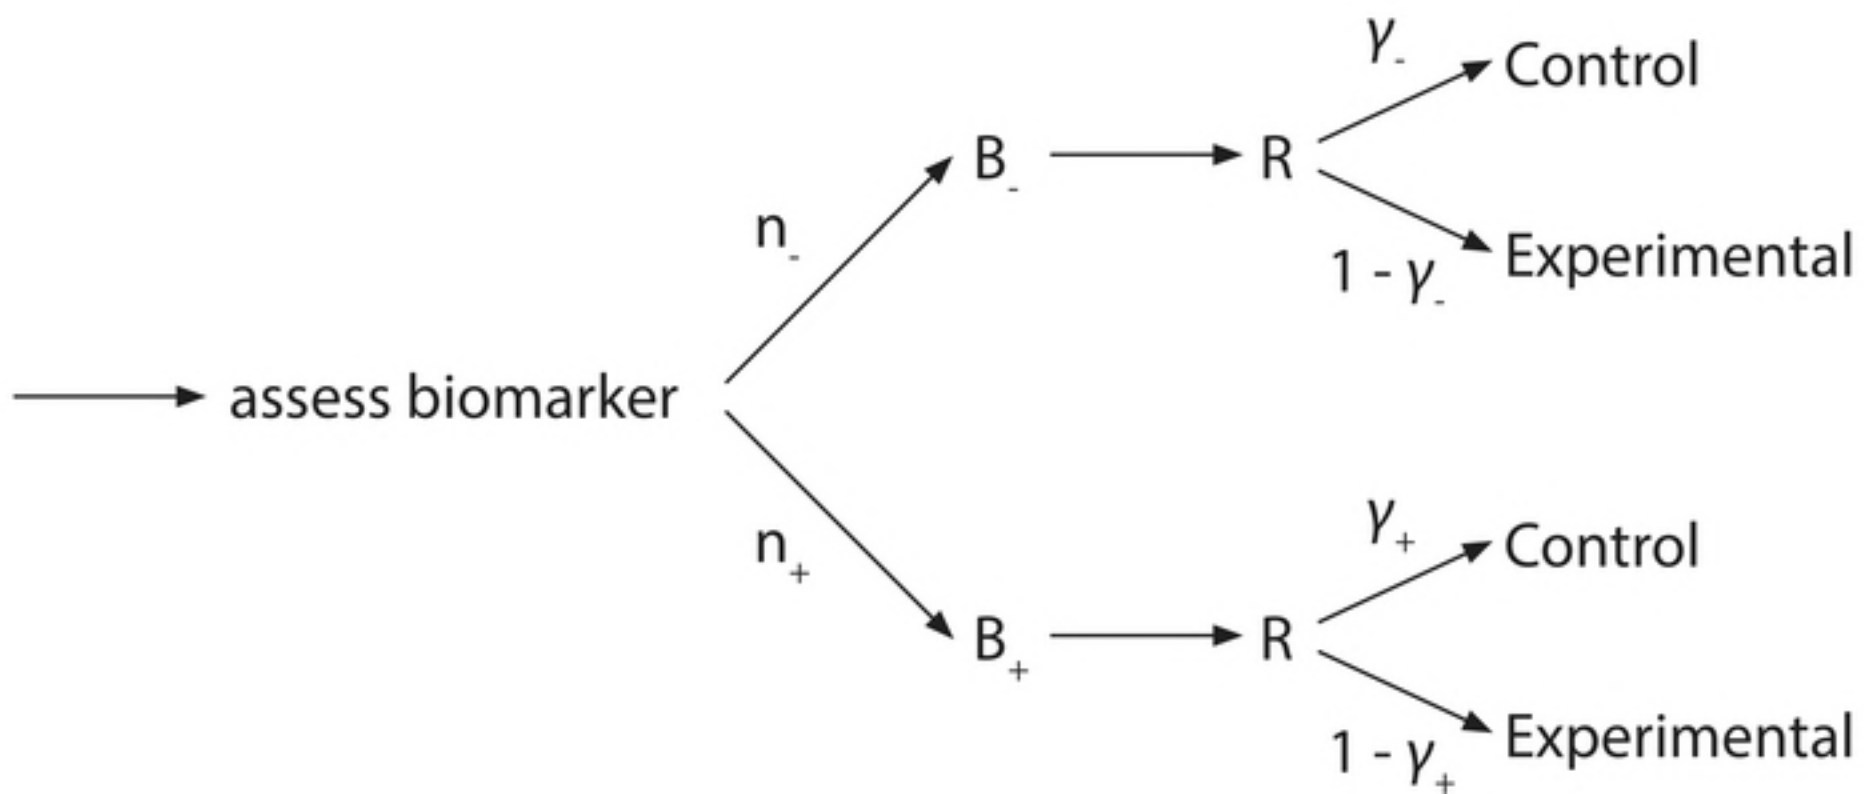

**A**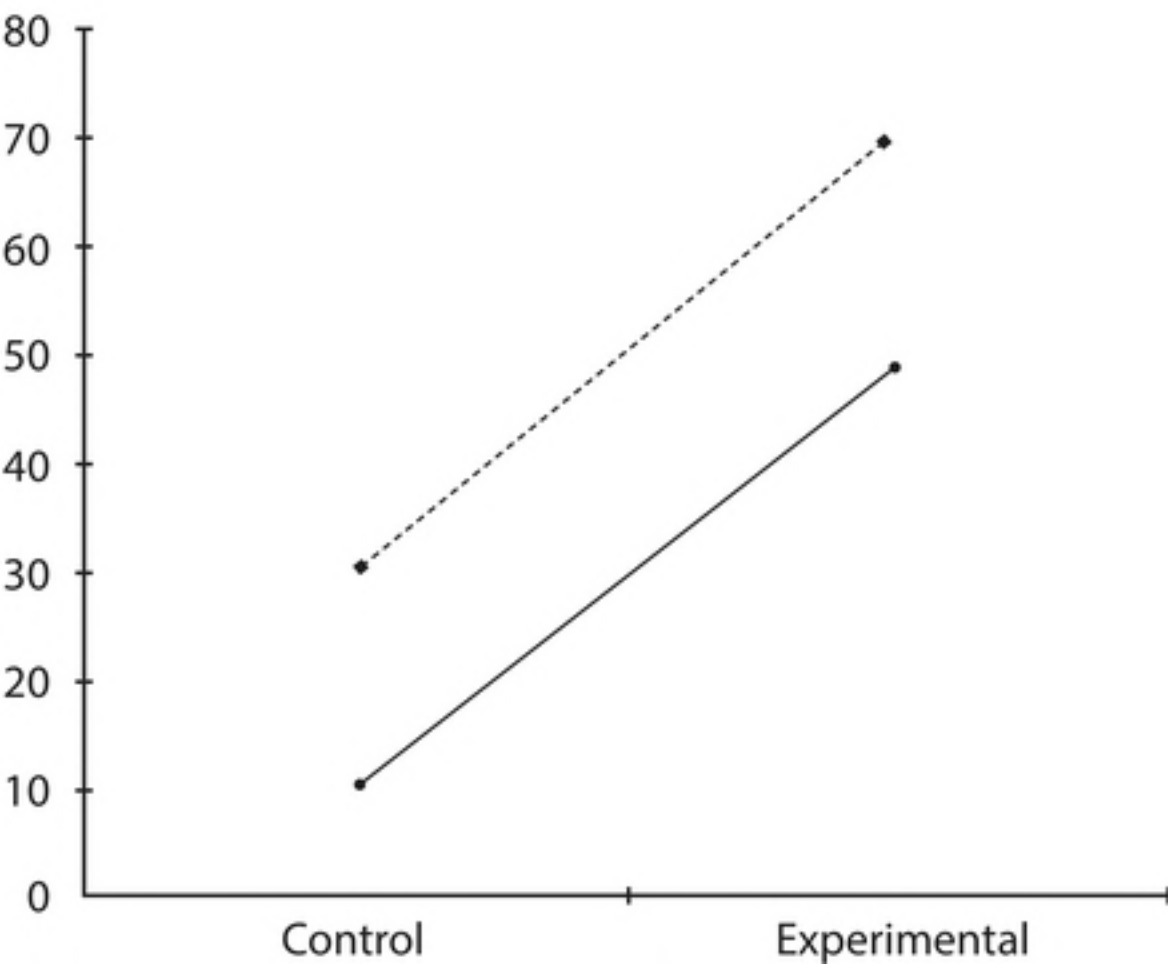**B**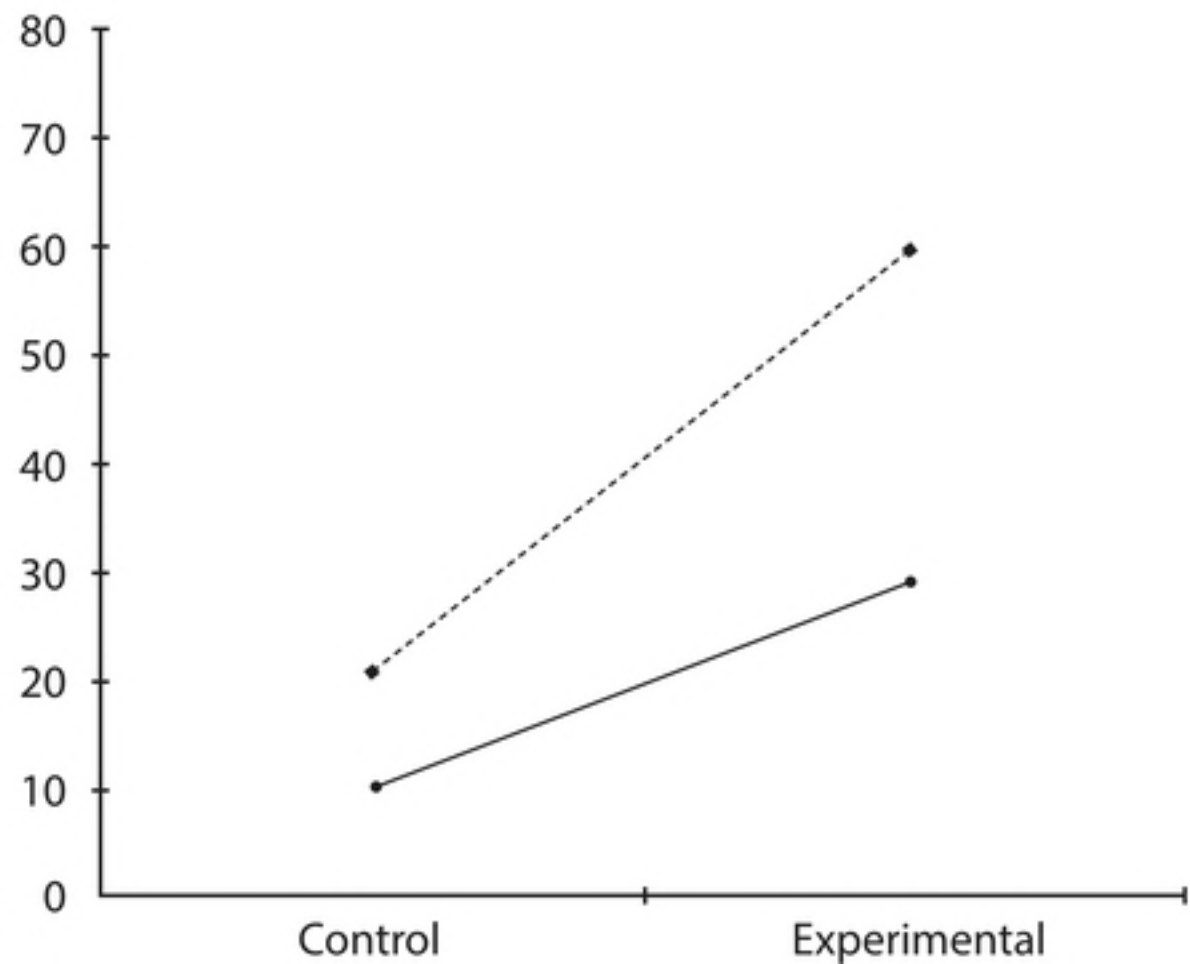

**A**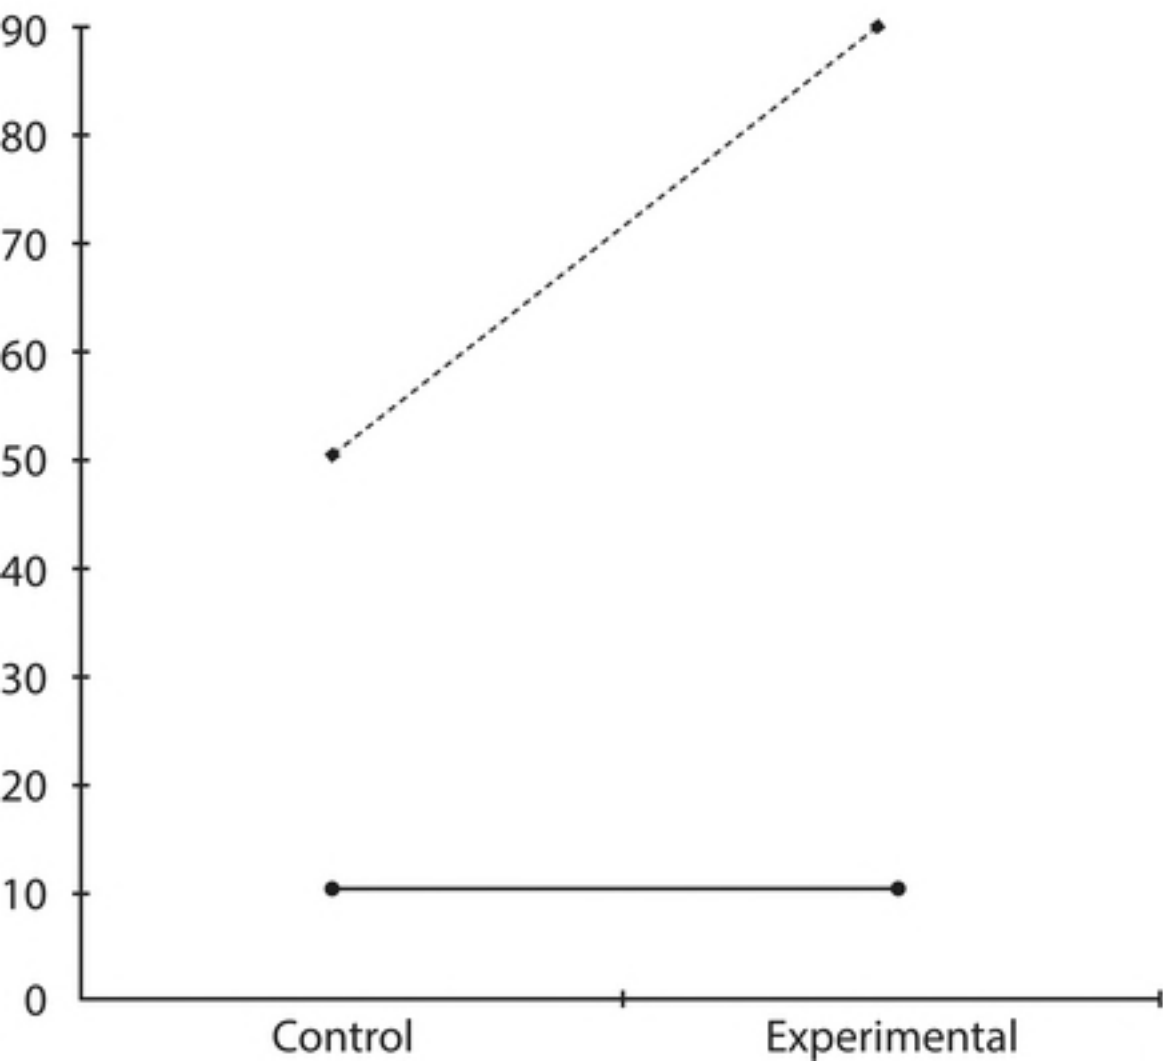**B**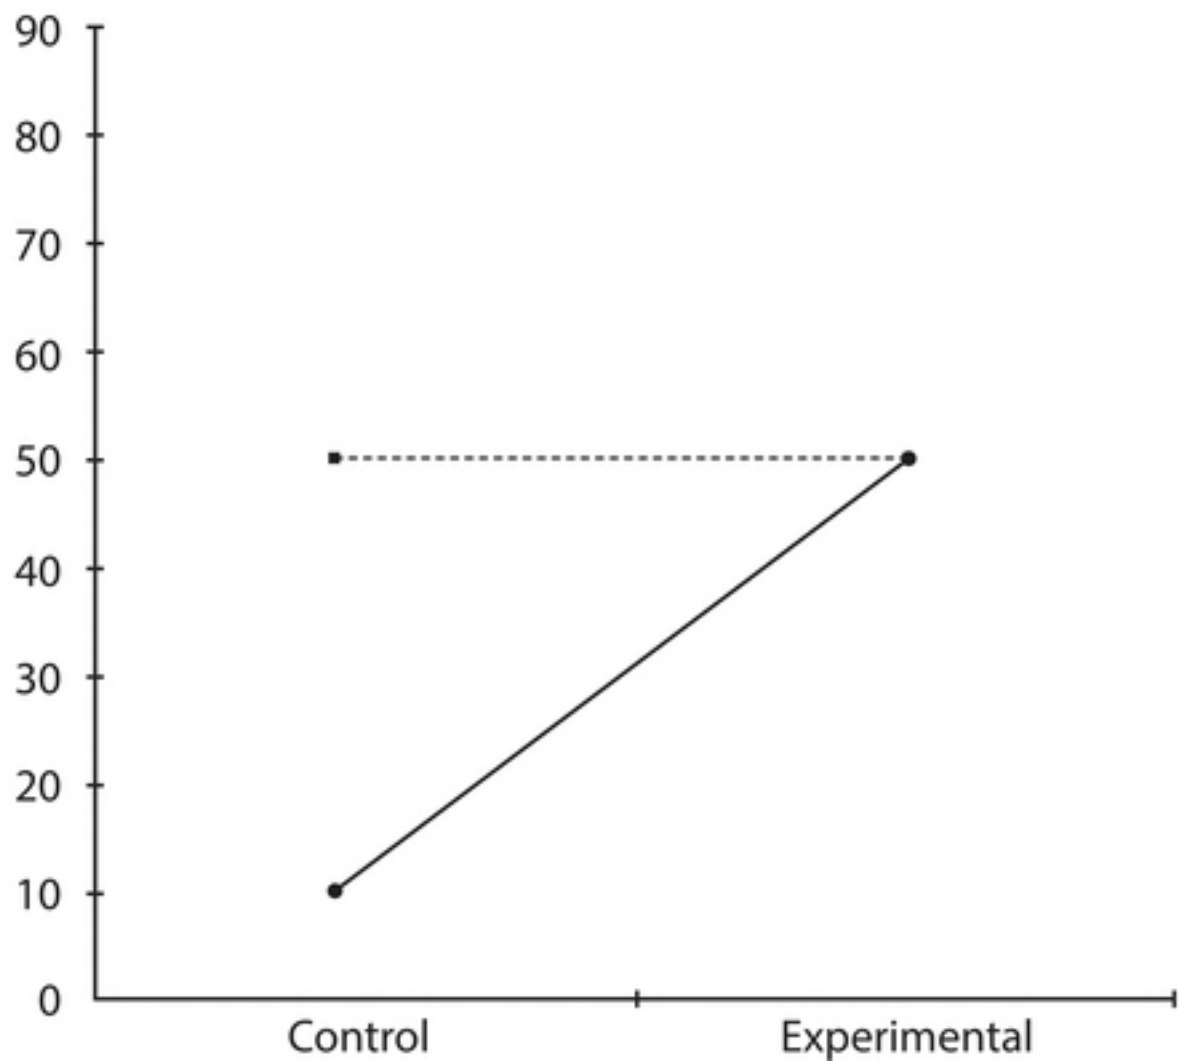

Source: https://www.biorxiv.org/content/10.1101/347096v1.full.pdf
